# Supplementary material
Source: Springer Nature journal article supplement (https://www.springermedizin.de/resource/supplementary/13019_2007_128_MOESM1_ESM.pdf/9637906)

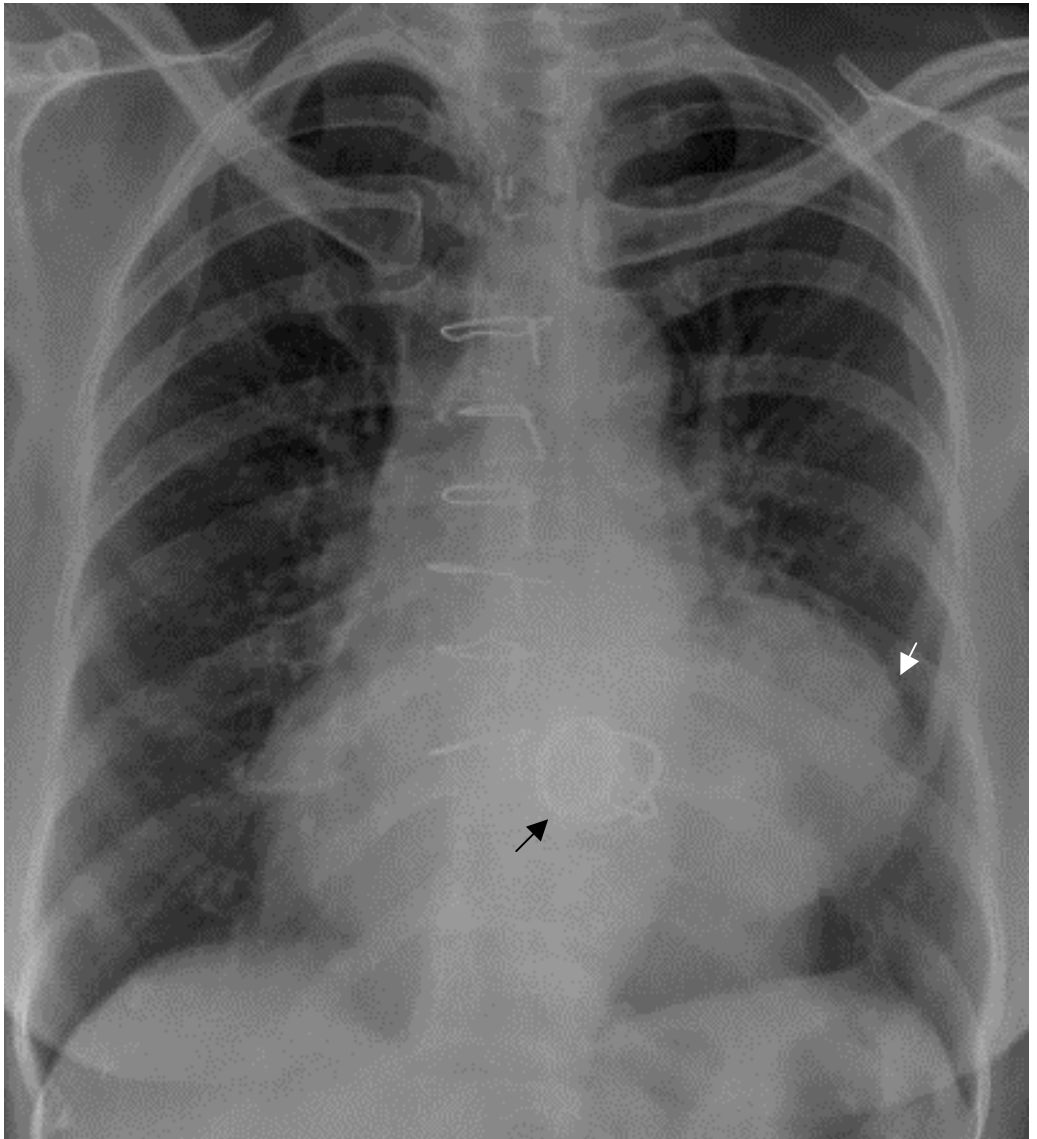

Supplement: MOESM1 [file 9637906]
